# Supplementary material
Source: Royal Society of Chemistry journal article supplement (doi:10.1039/d6ta01736c)
Supplement: d6ta01736c1.pdf [file d6ta01736c1.pdf]

**One-Step Regulation of Pore Evolution in Hard Carbon from Open to Closed for High Rate and High Plateau Capacity Sodium-Ion Storage**

Rigan Xu<sup>a</sup>, Qi Liu <sup>\* a, b</sup>, Wenxiu He<sup>c</sup>, Daobin Mu <sup>a</sup>, Li Li <sup>a, b</sup>, Renjie Chen <sup>a, b</sup>, and Feng Wu <sup>a, b</sup>

<sup>a</sup>School of Material Science and Engineering, Beijing Institute of Technology, Beijing, 100081, China

<sup>b</sup>Advanced Technology Research Institute, Beijing Institute of Technology, Jinan 250300, China

<sup>c</sup> School of Chemistry and Chemical Engineering, Inner Mongolia University of Science & Technology, Baotou, 014010, China

\*Email: liuqi985@bit.edu.cn

### Correlation formula

$d_{002}$  is calculated from calculated by the Bragg's equation:

$$d_{(002)}(nm) = \frac{\lambda}{2\sin\theta} \quad (S1)$$

The SAXS fitted model is as follows:

$$I(Q) = \frac{A}{Q^4} + \frac{Ba_1^4}{(1 + a_1^2Q^2)^2} + D \quad (S2)$$

where A and B are proportional to the total surface areas of the large and small pores, respectively. Q is the scattering vector and D is a constant background term. The diameters of closed nanopores can be obtained from a1 value ( $R=2*a_1*10^{1/2}$ ).

### Calculation of apparent $Na^+$ diffusion coefficients through GITT results

The calculation formula is as follows.

$$D_{Na^+} = \frac{4}{\pi\tau} \left( \frac{m_B V_m}{M_B S} \right)^2 \left( \frac{\Delta E_s}{\Delta E_\tau} \right)^2 \quad (S3)$$

Here,  $\tau$ ,  $m_B$ ,  $M_B$ ,  $V_m$  and S are the pulse duration, the mass of the electrode active material, molar mass, molar volume and effective contact area, respectively. In addition,  $\Delta E_s$  is the voltage change caused by the pulse, and  $\Delta E_\tau$  is the voltage change in a constant current charging (discharging) process.

The  $b$  value can be estimated based on the formula:

$$i = av^b \quad (S4)$$

Here  $i$  is the peak current,  $v$  is the scan rate,  $a$  and  $b$  are constants.

**Quantitative the contribution of the capacitive-controlled and diffusion-controlled process by the formula:**

$$i(V) = k_1v + k_2v^{1/2} \quad (S5)$$

Here,  $k_1v$  and  $k_2v^{1/2}$  correspond to the capacitive-controlled and diffusion-controlled capacity contribution, respectively.

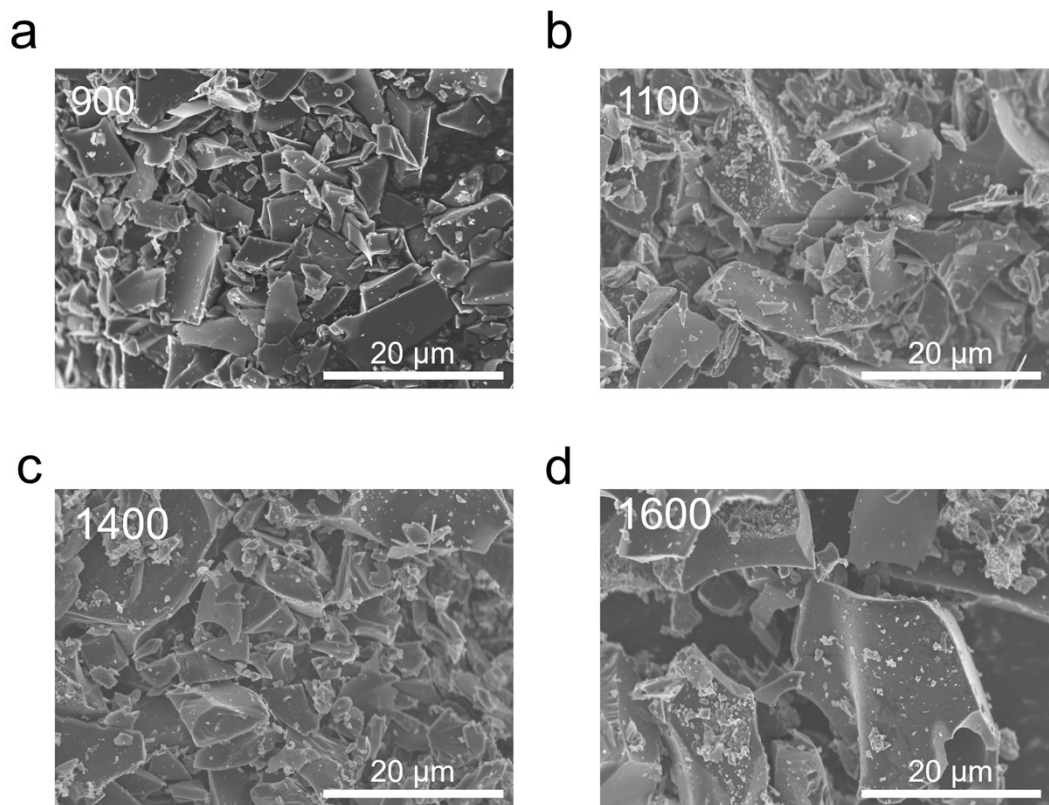

**Figure S1** SEM image of the (a) 900, (b) 1100, (c) 1400, and (d) 1600 materials.

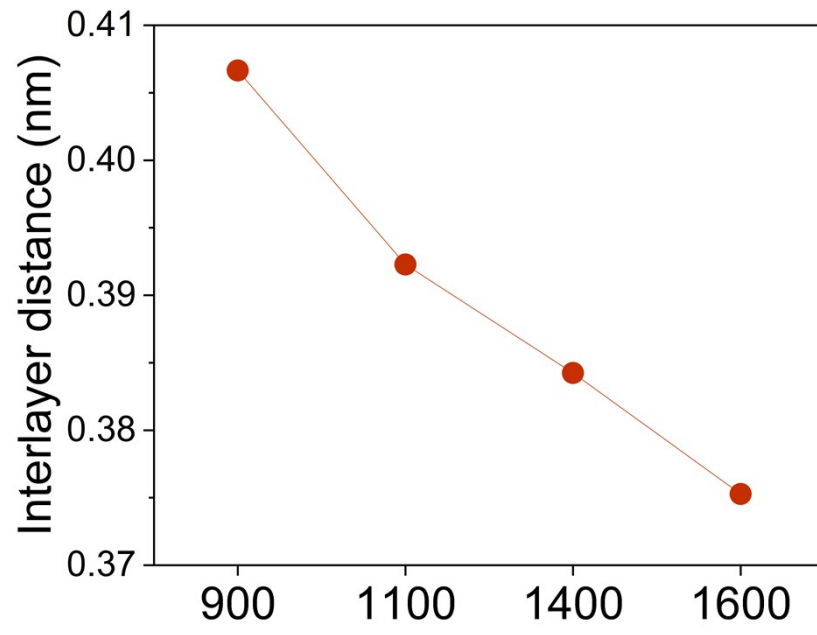

**Figure S2**  $d_{002}$  of samples.

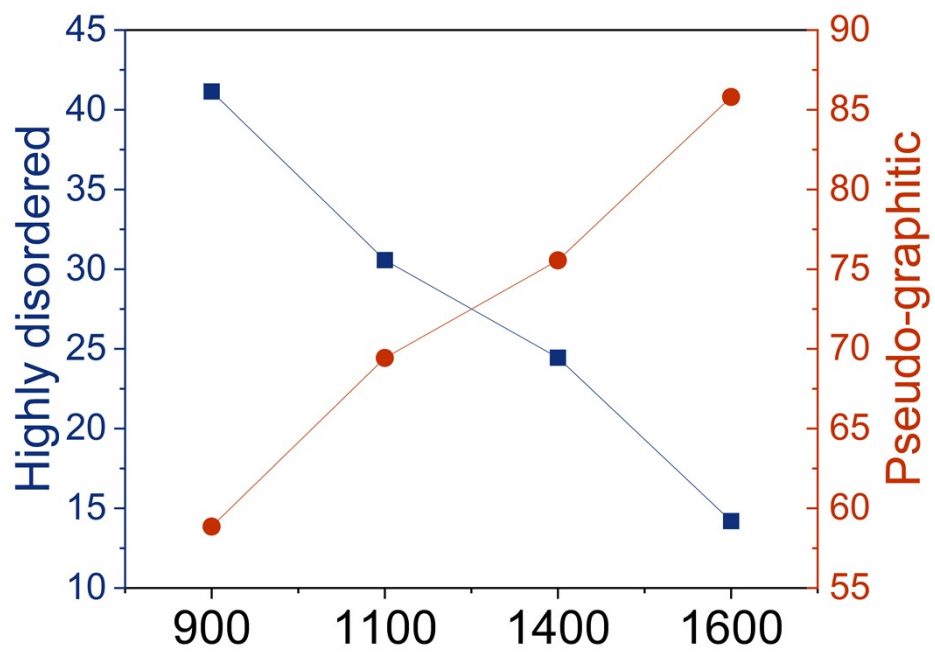

**Figure S3** The area percentages of the two regions after fitting.

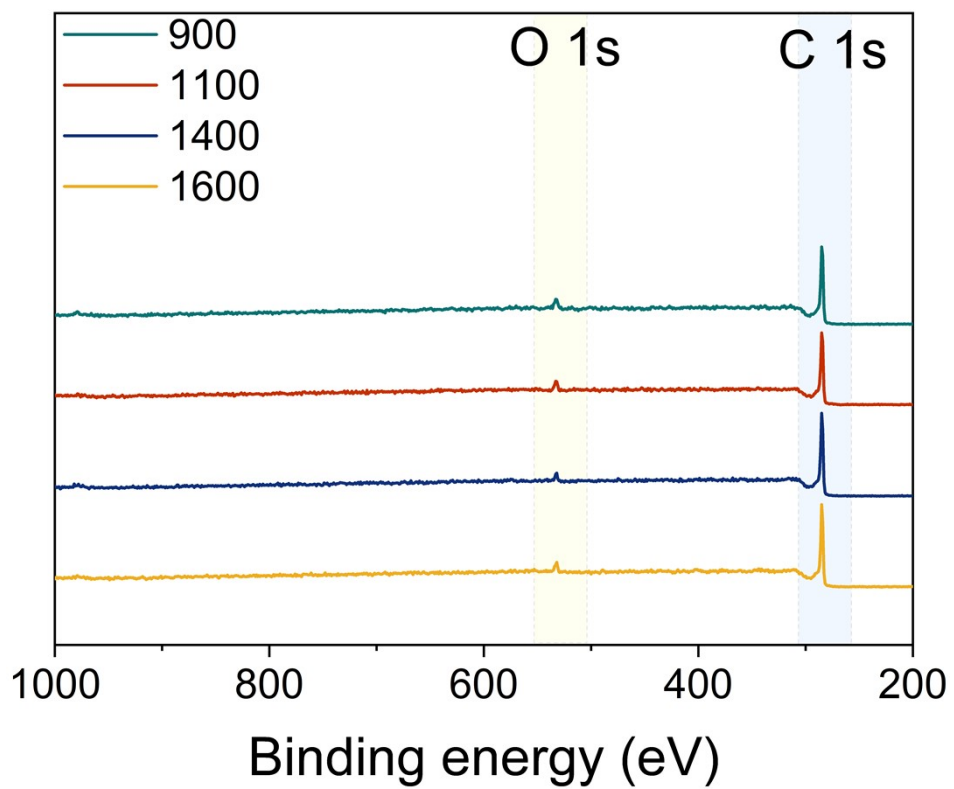

**Figure S4** XPS whole spectra of the 900, 1100, 1400, and 1600 materials.

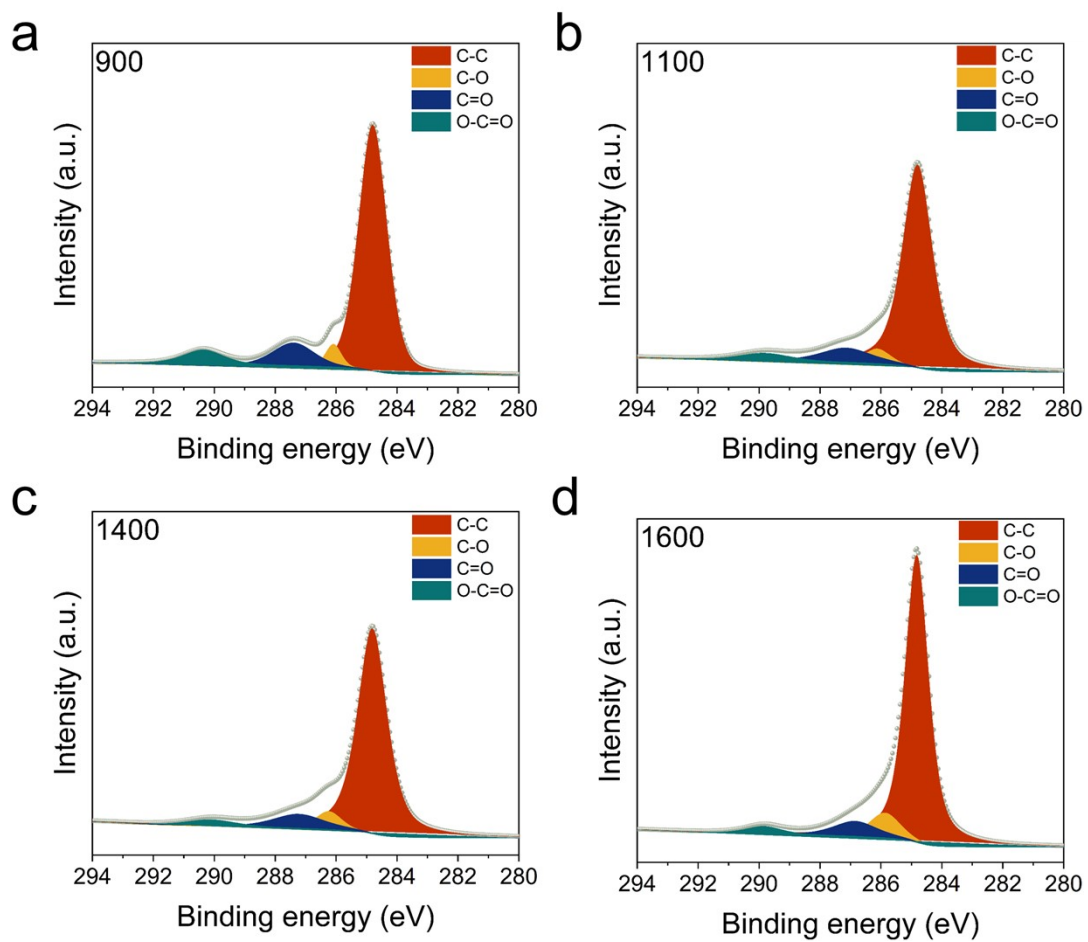

**Figure S5** C 1s XPS high-resolution spectra of samples.

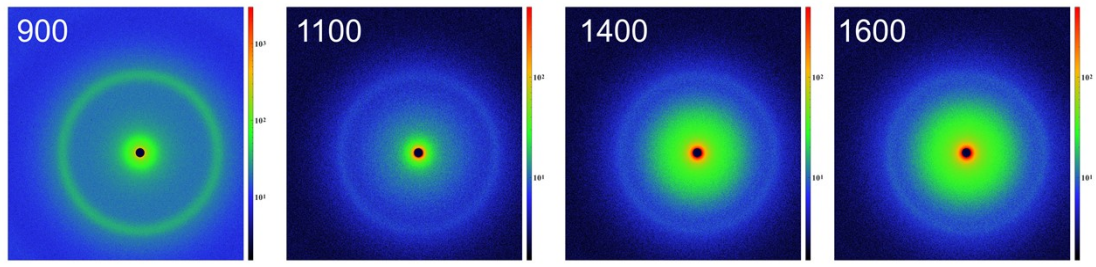

**Figure S6** 2D SAXS profiles of samples.

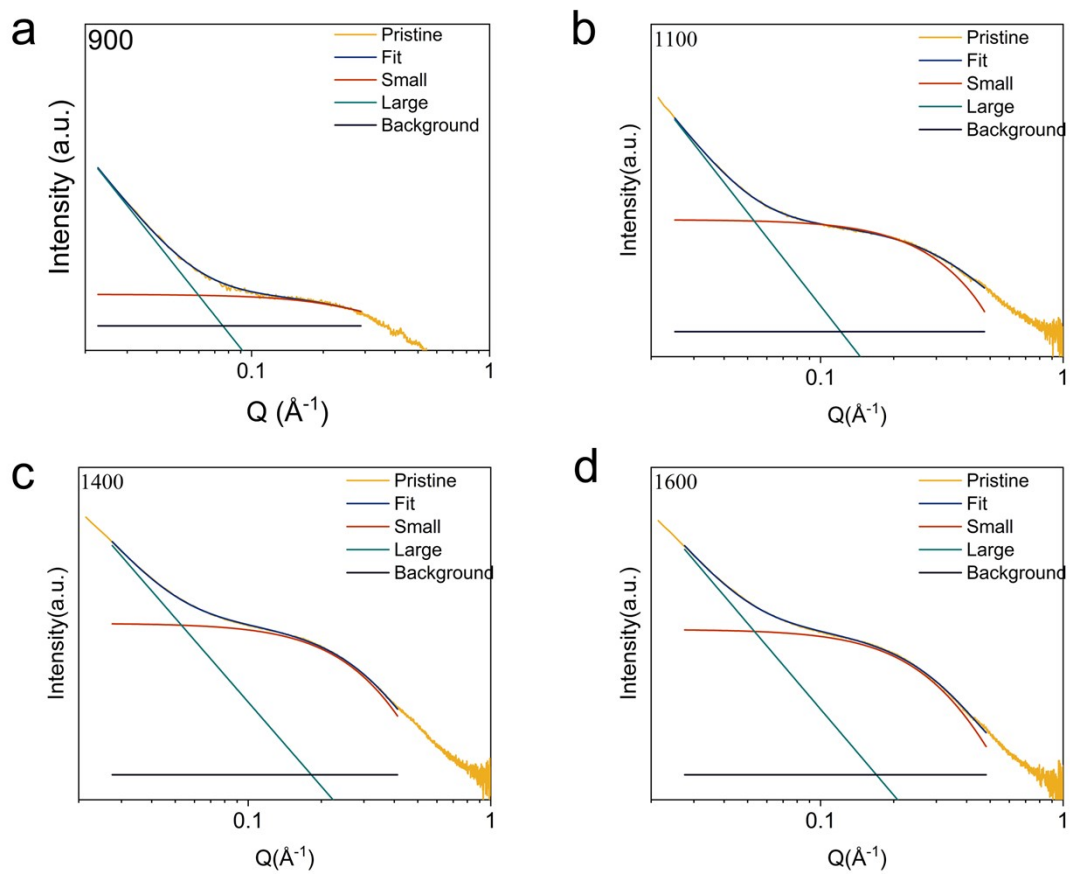

**Figure S7** Fitted SAXS patterns of (a) 900, (b) 1100, (b) 1400, and (d) 1600 samples.

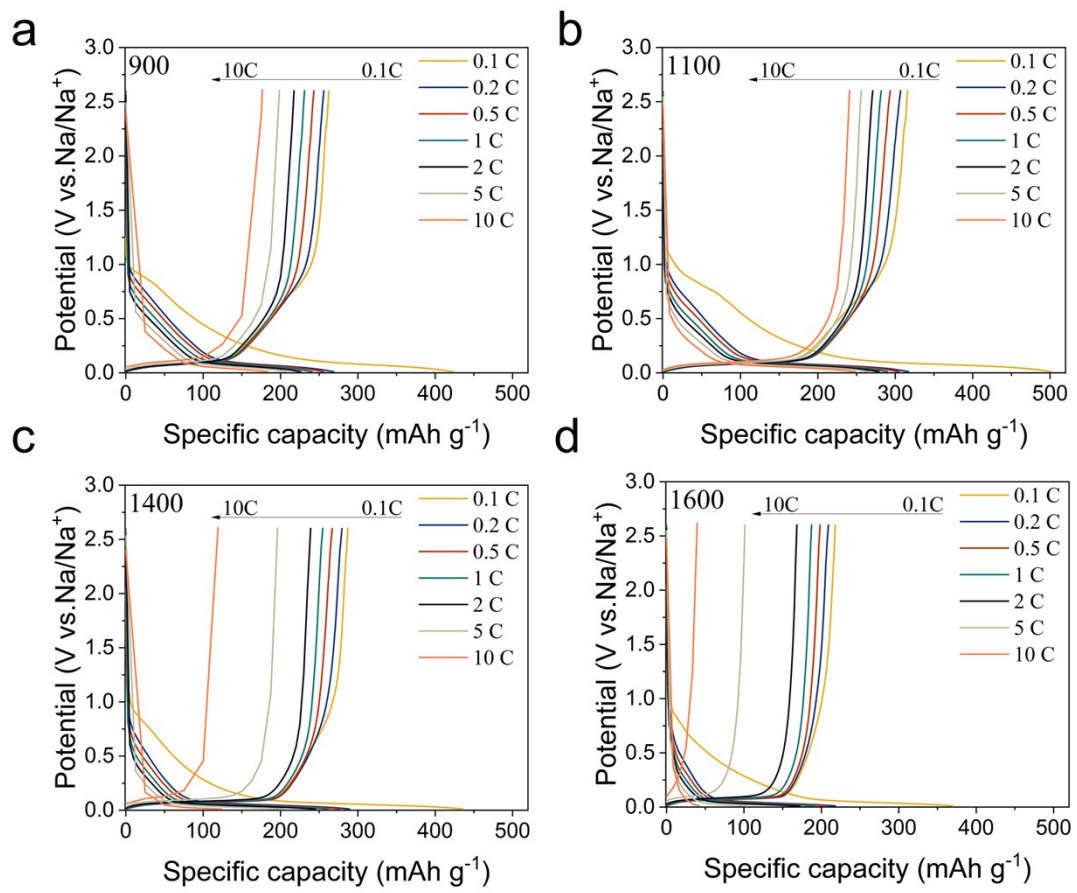

**Figure S8** GCD curves at different current density of (a) 900, (b) 1100, (b) 1400, and (d) 1600 electrodes.

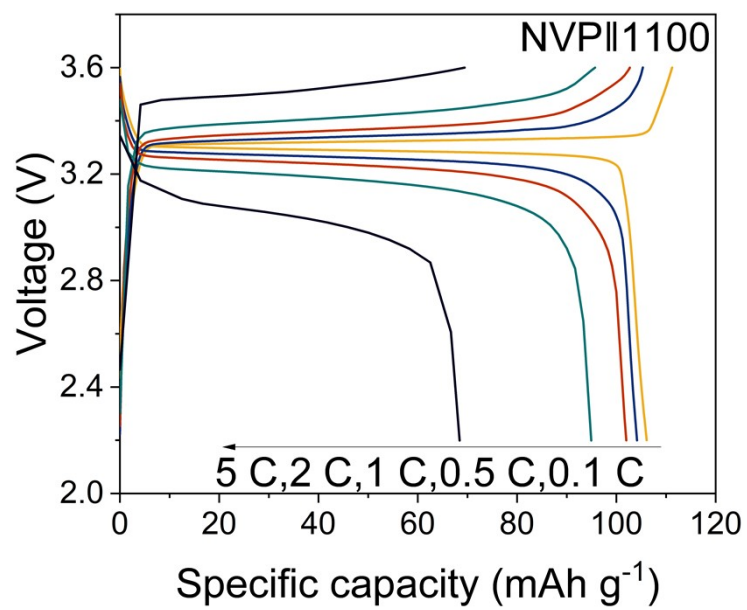

**Figure S9** GCD curve of NVP||1100 full cell at different rate.

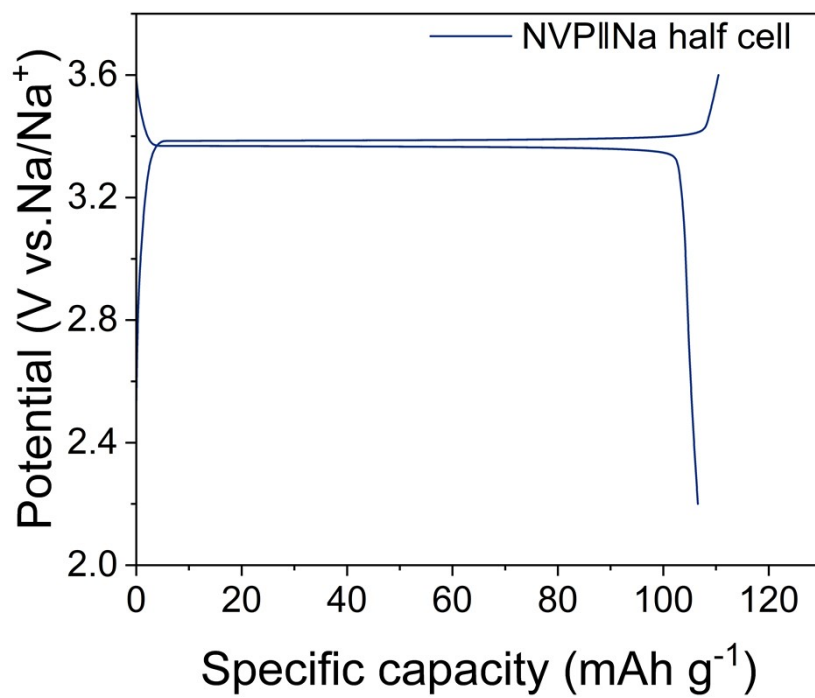

**Figure S10** First GCD curve of NVP||Na half cell.

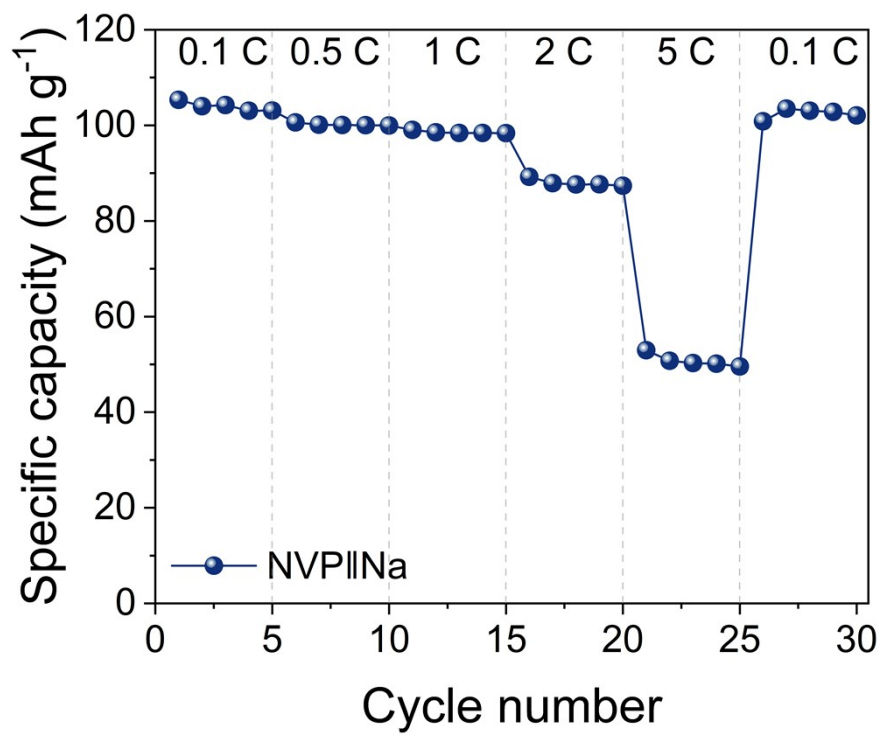

**Figure S11** The rate performance of the NVPI/Na half cell.

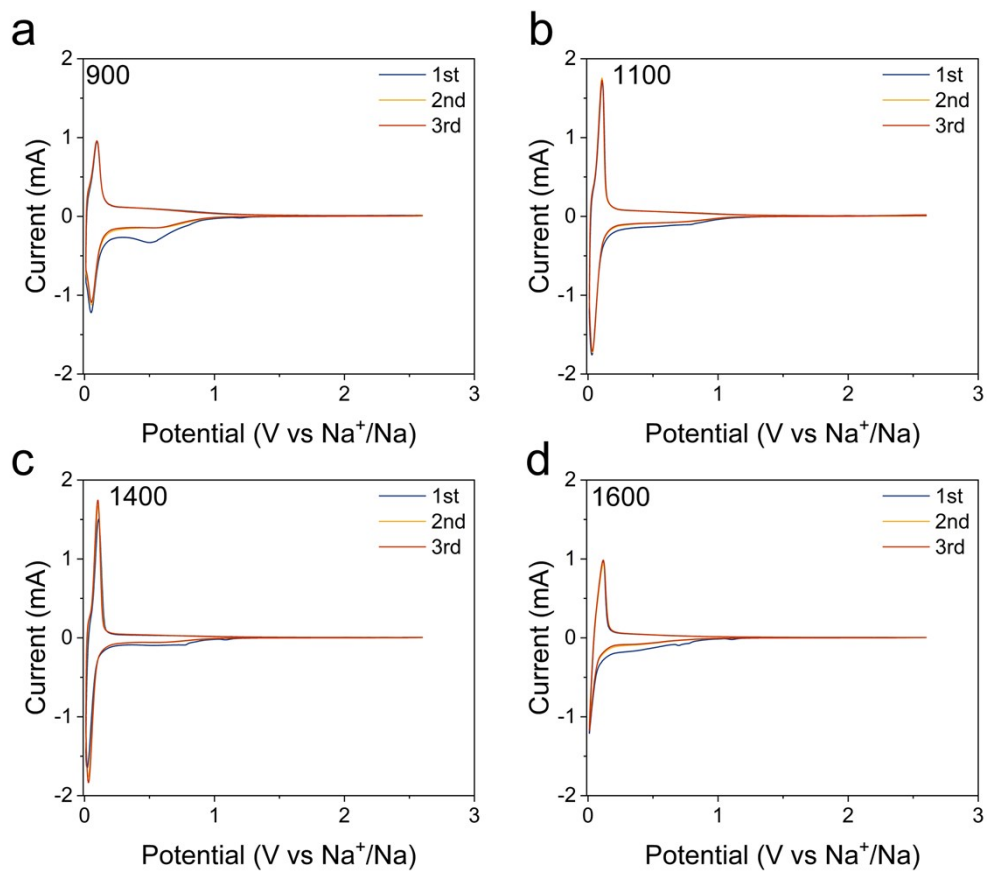

**Figure S12** CV curves under  $0.1 \text{ mV s}^{-1}$  for (a) 900, (b) 1100, (b) 1400, and (d) 1600 anodes.

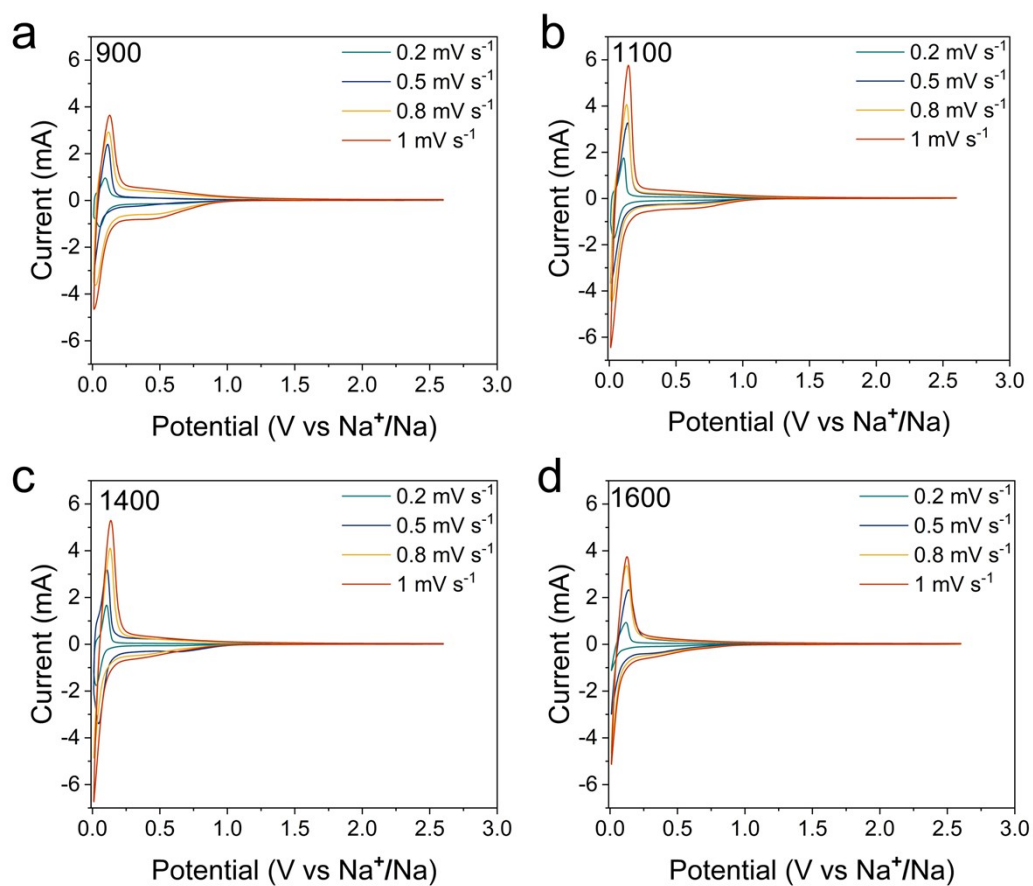

**Figure S13** CV curves under different scan rates from 0.1 to 1.0 mV s<sup>-1</sup> of (a) 900, (b) 1100, (c) 1400, and (d) 1600 anodes.

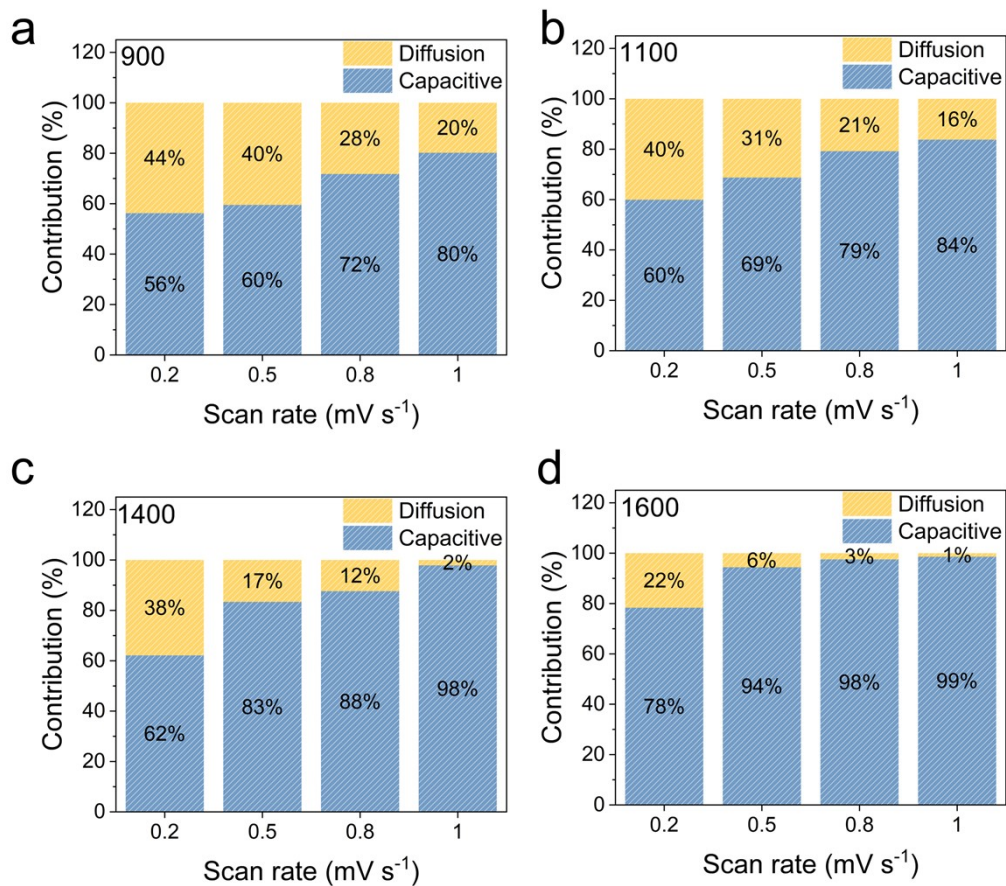

**Figure S14** Capacitive capacity contribution at different scan rates of (a) 900, (b) 1100, (c) 1400, and (d) 1600 anodes.

| Sample | 2 $\theta$ [°] | d <sub>002</sub> (nm) | Highly disordered (2 $\theta$<br>[°]=21.12) | Pseudo-graphitic (2 $\theta$<br>[°]=23.98) |
|--------|----------------|-----------------------|---------------------------------------------|--------------------------------------------|
| 900    | 21.83          | 0.4067                | 41.15%                                      | 58.85%                                     |
| 1100   | 22.64          | 0.3923                | 30.57%                                      | 69.43%                                     |
| 1400   | 23.12          | 0.3842                | 24.44%                                      | 75.56%                                     |
| 1600   | 23.68          | 0.3753                | 14.20%                                      | 85.80%                                     |

**Table S1** Physical parameters of different samples from the XRD spectra.

| Sample | N <sub>2</sub> -BET surface<br>area (m <sup>2</sup> g <sup>-1</sup> ) | N <sub>2</sub> -Total pore<br>volume (cm <sup>3</sup> g <sup>-1</sup> ) | CO <sub>2</sub> -BET<br>surface area (m <sup>2</sup><br>g <sup>-1</sup> ) | CO <sub>2</sub> -Total pore<br>volume (cm <sup>3</sup> g <sup>-1</sup> ) |
|--------|-----------------------------------------------------------------------|-------------------------------------------------------------------------|---------------------------------------------------------------------------|--------------------------------------------------------------------------|
| 900    | 556.91                                                                | 0.22                                                                    | 502.67                                                                    | 0.237                                                                    |
| 1100   | 8.13                                                                  | 0.024                                                                   | 465.41                                                                    | 0.211                                                                    |
| 1400   | 6.82                                                                  | 0.0049                                                                  | 110.94                                                                    | 0.0851                                                                   |
| 1600   | 1.23                                                                  | 0.0016                                                                  | 88.35                                                                     | 0.0582                                                                   |

**Table S2** Physical parameters of different samples from the XRD spectra.

**Table S3** C, O percentage from XPS analysis

| Sample     | C (%) | O (%) |
|------------|-------|-------|
| <b>900</b> | 93.95 | 6.05  |
| 1100       | 94.38 | 5.62  |
| 1400       | 94.73 | 5.27  |
| 1600       | 95.75 | 4.25  |

**Table S4** The proportion of C 1s element in the XPS fitting curve in different materials.

| Sample | C-C   | C-O  | C=O   | O-C=O |
|--------|-------|------|-------|-------|
| 900    | 78.25 | 3.97 | 10.59 | 7.19  |
| 1100   | 79.61 | 4.73 | 10.22 | 5.44  |
| 1400   | 79.67 | 5.68 | 9.90  | 4.75  |
| 1600   | 80.40 | 8.33 | 7.85  | 3.42  |

**Table S5** The proportion of O 1s element in the XPS fitting curve in different materials.

| Sample | C-O   | C=O   |
|--------|-------|-------|
| 900    | 9.84  | 90.16 |
| 1100   | 10.54 | 89.46 |
| 1400   | 19.66 | 80.34 |
| 1600   | 33.82 | 66.18 |

**Table S6** The proportion of fitting peak in the Raman fitting curve in samples.

| Sample | $A_{D1}/A_G$ | $A_{D3}/A_G$ |
|--------|--------------|--------------|
| 900    | 3.247        | 2.14         |
| 1100   | 2.14         | 1.54         |
| 1400   | 2.00         | 0.94889      |
| 1600   | 1.798        | 0.899        |

**Table S7** The pore structure of samples.

| Sample | R (nm) Average diameter obtained from SAXS fitting |
|--------|----------------------------------------------------|
| 900    | 0.668                                              |
| 1100   | 2.307                                              |
| 1400   | 3.196                                              |

---

1600 3.409

---
